# Supplementary material
Source: Springer Nature journal article supplement (https://www.springerprofessional.de/resource/supplementary/13638_2011_285_MOESM11_ESM.pdf/11898096)

(a)

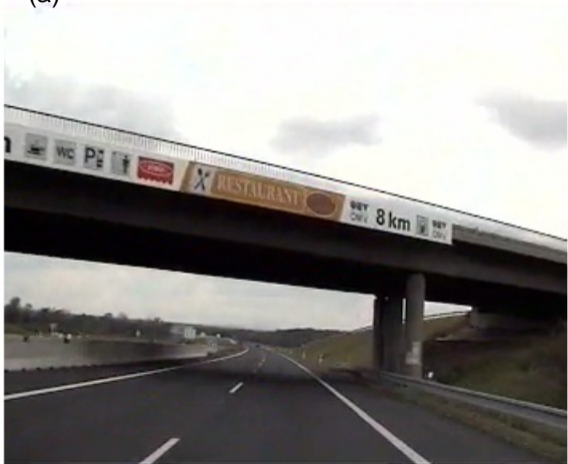

(b)

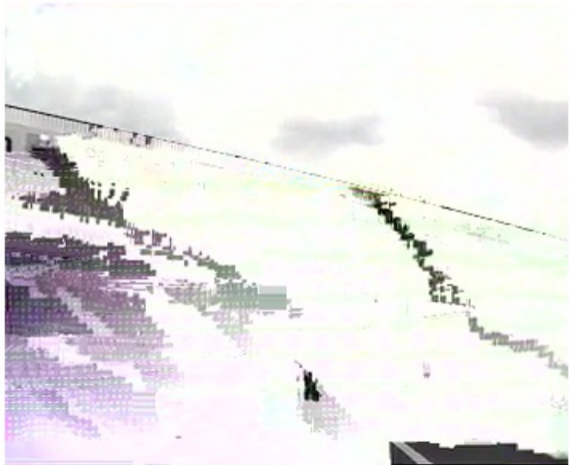

Supplement: MOESM11 [file 11898096]
